# Supplementary material for: High resolution FTIR imaging provides automated discrimination and detection of single malaria parasite infected erythrocytes on glass
Source: Royal Society of Chemistry journal article supplement (doi:10.1039/c5fd00181a), 2015-12-22

**Supporting Information**

**HIGH RESOLUTION FTIR IMAGING PROVIDES AUTOMATED  
DISCRIMINATION AND DETECTION OF SINGLE MALARIA  
PARASITE INFECTED ERYTHROCYTES ON GLASS**

*David Perez-Guaita<sup>1</sup>, Dean Andrew<sup>2</sup>, Philip Heraud<sup>1</sup>, Jack Richards<sup>2,3,4</sup>, James Beeson<sup>2,3,4</sup>,  
David Anderson<sup>2</sup>, Bayden R. Wood<sup>1\*</sup>*

<sup>1</sup> Centre for Biospectroscopy, Monash University, Clayton, 3800, Victoria, Australia

<sup>2</sup> Centre for Biomedical Research, Burnet Institute, Melbourne, Victoria, Australia

<sup>3</sup>Department of Microbiology, Monash University, Clayton, Victoria, Australia

<sup>4</sup>Department of Medicine, University of Melbourne, Parkville, Victoria, Australia

**Figure 1S:** Infrared and visible images of cells selected for the PLSDA analysis performed on section 3.3. The cells in this case were selected by hand and not using the automated cell selection routine.

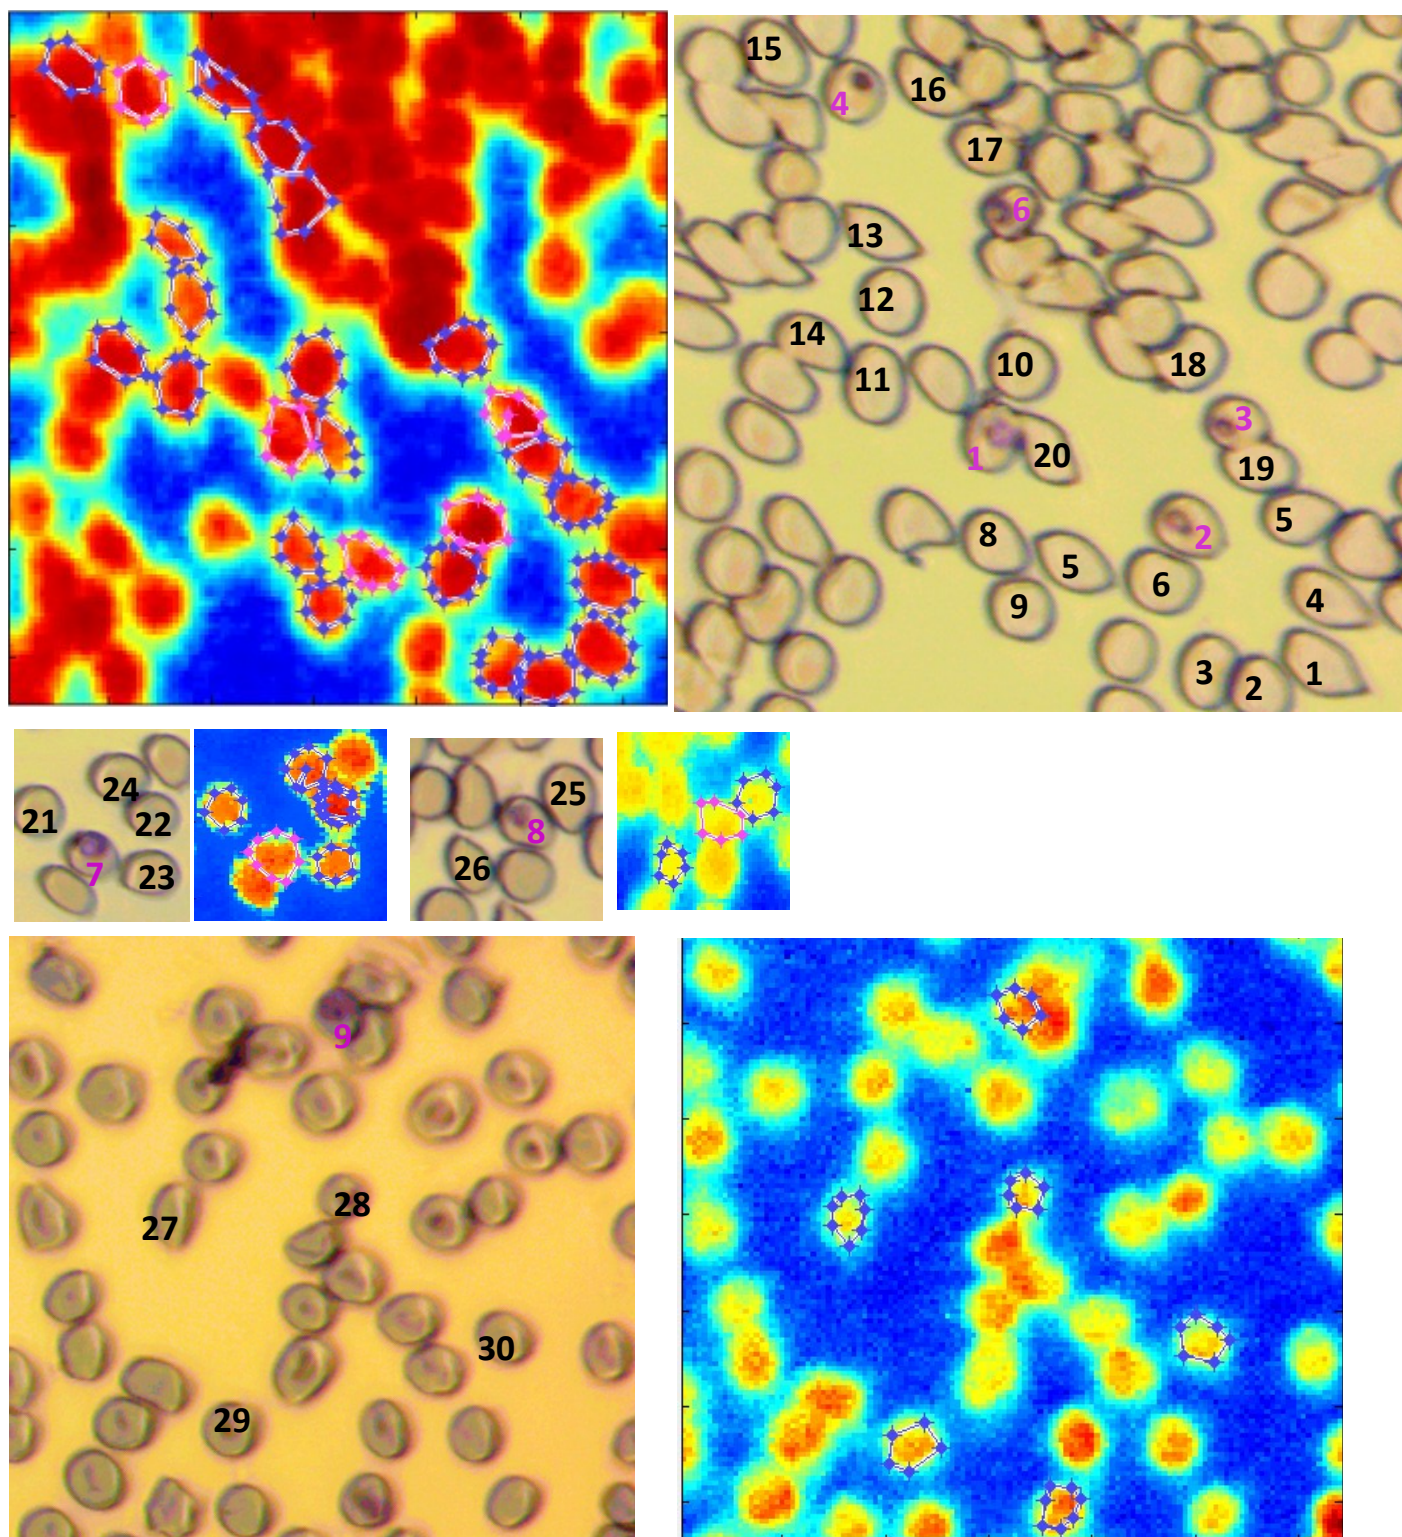

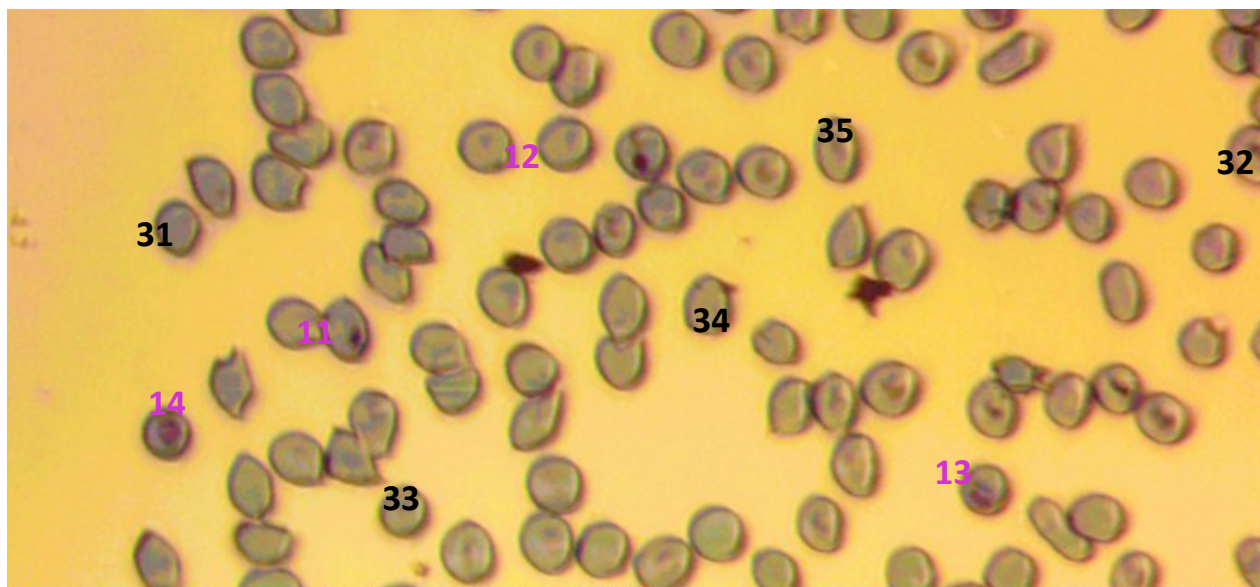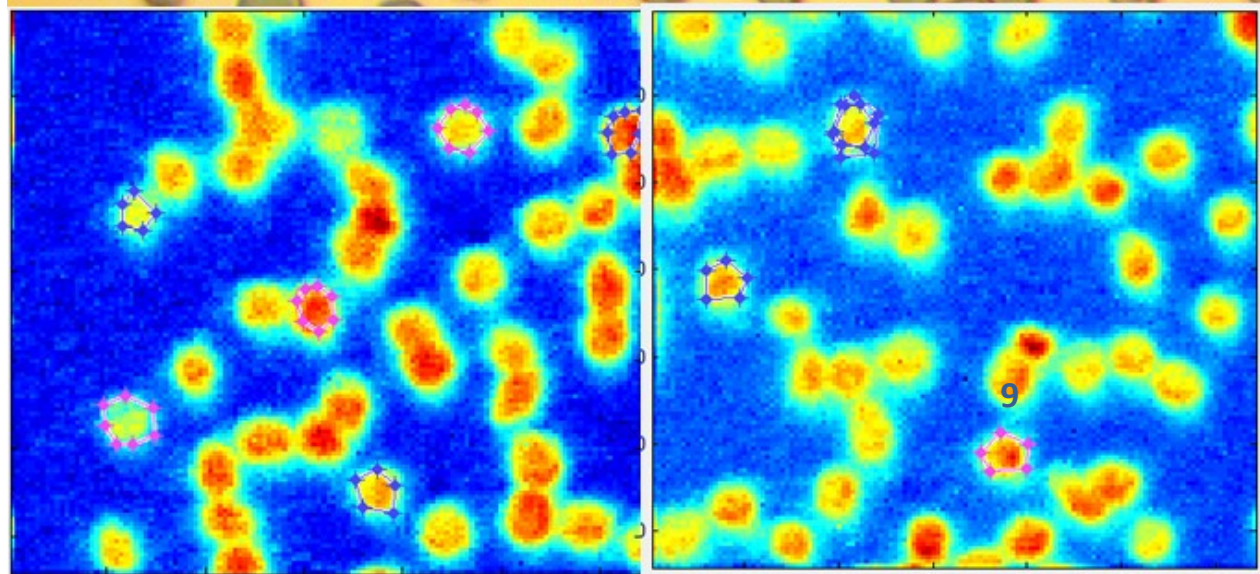

Supplement: c5fd00181a1.pdf [file c5fd00181a1.pdf]
